# Supplementary material for: Myśl emigracyjno-kolonialna w poglądach Leopolda Caro w latach 1908-1914
Source: Royal Society of Chemistry journal article supplement (doi:10.1039/c6cp06323c), 2009-01-01
Supplement: c6cp06323c1.pdf [file c6cp06323c1.pdf]

Electronic Supplementary Information for

**High-pressure dielectric behavior of BaMoO<sub>4</sub>: A combined experimental  
and theoretical study**

Tianru Qin,<sup>a</sup> Qinglin Wang,<sup>b</sup> Li Wang,<sup>a</sup> Huacai Yan,<sup>a</sup> Cailong Liu,<sup>a</sup> Yonghao Han,<sup>a</sup>  
Yanzhang Ma<sup>cd</sup> and Chunxiao Gao<sup>\*a</sup>

*<sup>a</sup>State Key Laboratory of Superhard Materials, Jilin University, Changchun 130012, China*

*<sup>b</sup>Shandong Key Laboratory of Optical Communication Science and Technology, School of  
Physics Science & Information Technology of Liaocheng University, Liaocheng 252059,  
China*

*<sup>c</sup>Department of Mechanical Engineering, Texas Tech University, Lubbock, Texas 79409, USA*

*<sup>d</sup>Center for High Pressure Science & Technology Advanced Research, Changchun 130012,  
China*

\*To whom correspondence should be addressed.

Email: cc060109@qq.com

## Supplementary Material

BaMoO<sub>4</sub> powder with purity of 99.9% was bought from the Alfa Aesar Co. The initial structure of the sample was the tetragonal structure (space group I41/a), and has been confirmed by a powder X-ray diffractometer with Cu-K $\alpha$  radiation. Figure S1 gives the XRD spectrum.

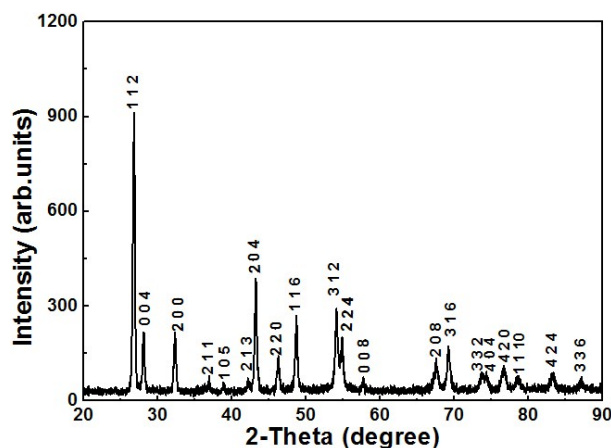

**Figure S1.** X-ray diffraction pattern of the BaMoO<sub>4</sub> sample at ambient pressure.

The energy band structures of the tetragonal and monoclinic phase were calculated at different pressures by the first-principles calculations, the variation tendency of band gap ( $E_g$ ) along with pressure was obtained. In Table S1, We make a comparison between  $dE_g/dP$  and  $d(\ln R)/d(P)$  through the following Arrhennius relationship.

$$d(\ln R)/dP = (1/2k_B T)(dE_g/dP), \quad (S1)$$

where  $R$  is the resistance received from the experiment,  $E_g$  represents the band gap received from the theoretical calculations,  $k_B$  is the Boltzmann constant, and  $T$  represents room temperature. The result indicates that the effect of pressure on the band gap did not play a vital role in the two phases. Therefore, we contend that the growth of  $R$  is mainly caused by the increasing defect levels, and the lattice scattering was enhanced.

**Table S1.** The pressure dependence of  $E_g$  and  $\ln R$  for the first two phases of BaMoO<sub>4</sub>

| Phase      | Pressure region (GPa) | $(2k_B T)^{-1} dE_g/dP$ (GPa <sup>-1</sup> ) (theoretical) | $d(\ln R)/dP$ (GPa <sup>-1</sup> ) (experimental) |
|------------|-----------------------|------------------------------------------------------------|---------------------------------------------------|
| Tetragonal | 1.9~4.8               | 0.02                                                       | 0.05                                              |
| Monoclinic | 4.8~8.8               | 0.01                                                       | 0.14                                              |
